# Supplementary material
Source: PubMed Central journal article supplement (PMC544605)
Supplement: JCI0523084sd.pdf [file JCI0523084sd.pdf]

## Supplemental Material

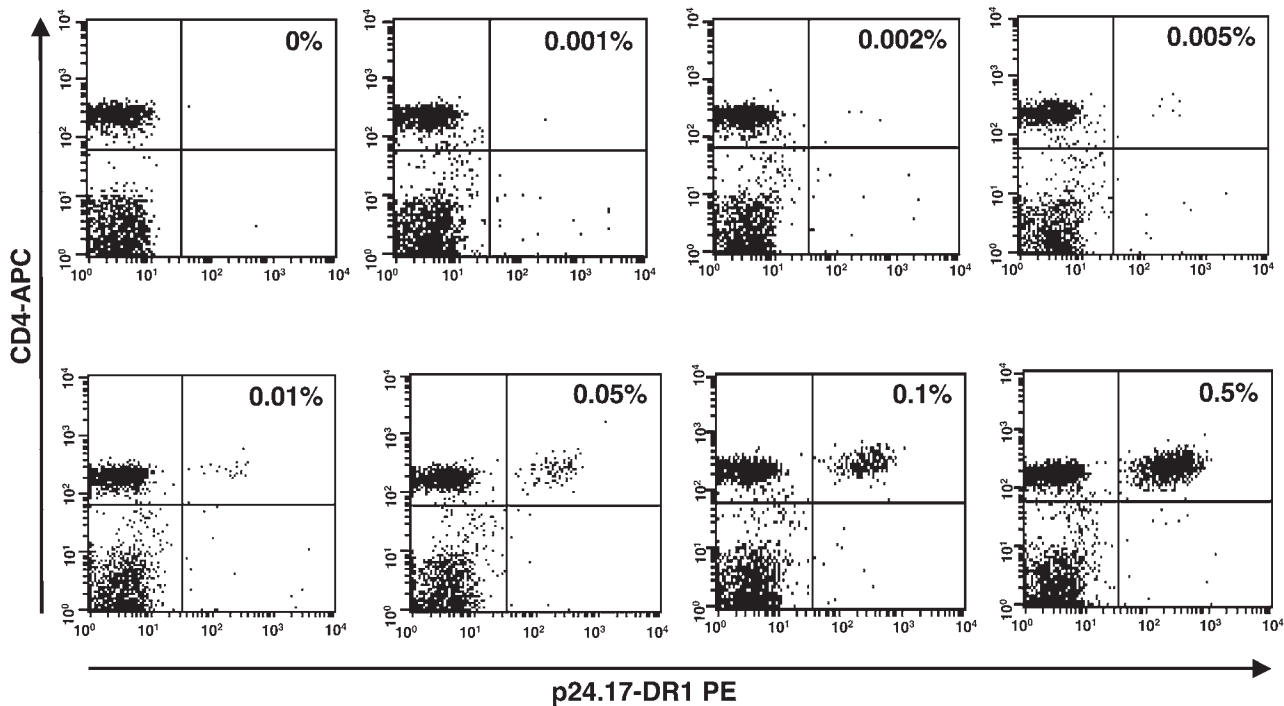

**Supplementary Figure 1.** Linear recovery validation of tetramer<sup>+</sup> CD4<sup>+</sup> T cell enrichment. PBMC were spiked with p24.17 epitope-specific CD4<sup>+</sup> T cell clone 10, stained with the p24.17-DR1 tetramer and subjected to magnetic bead enrichment. The dot plots show the post-enrichment recovery of tetramer<sup>+</sup> CD4<sup>+</sup> clone cells for each frequency at which PBMC were spiked (shown in the upper right quadrant of each plot).

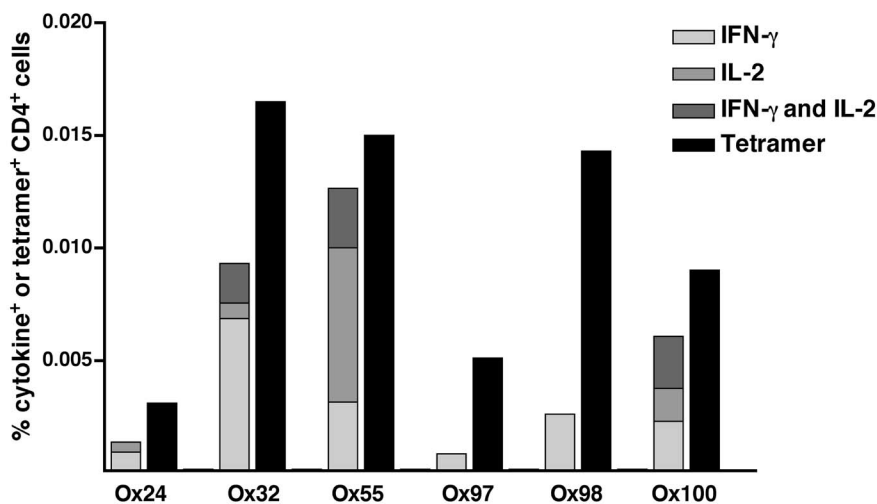

**Supplementary Figure 2.** Gag p24.17 peptide-specific cytokine responses are detectable in patients with p24.17-DR1 tetramer<sup>+</sup> cells. The frequencies of CD4<sup>+</sup> T cells out of total CD4<sup>+</sup> cells that produce IFN-γ, IL-2 or both are represented by the stacked grey bars and the frequencies of tetramer<sup>+</sup> cells are represented by the black bars.
